# Supplementary material
Source: PubMed Central journal article supplement (PMC3329934)
Supplement: NIHMS351914-supplement-1_si_001.pdf [file NIHMS351914-supplement-1_si_001.pdf]

# Generating Singlet Oxygen Bubbles: A New Mechanism for Gas-Liquid Oxidations in Water

Dorota Bartusik,<sup>1</sup> David Aebisher,<sup>1</sup> BiBi Ghafari,<sup>2</sup> Alan M. Lyons\*<sup>2</sup> and Alexander Greer\*<sup>1</sup>

<sup>1</sup>Department of Chemistry, Brooklyn College, City University of New York, Brooklyn, New York 11210

<sup>2</sup>Department of Chemistry, College of Staten Island, City University of New York, Staten Island, New York 10314

E-mail: alan.lyons@csi.cuny.edu; agreer@brooklyn.cuny.edu

## *Supporting Information*

### **Table of Contents**

Page

|    |                                                                                                     |
|----|-----------------------------------------------------------------------------------------------------|
| 1  | Table of Contents                                                                                   |
| 2  | Figure S1: Fluorescence spectrum of a thin sheet of Pc 1.                                           |
| 3  | Figure S2: UV-VIS spectrum of the <sup>1</sup> O <sub>2</sub> sensitizing glass Pc 1.               |
| 4  | Figure S3: Hybrid <sup>1</sup> O <sub>2</sub> sensitizing (phthalocyanine entrapped sol-gel) glass. |
| 5  | Figure S4: Loading of sensitizer particles into the chamber of a device.                            |
| 6  | Figure S5: Images of the SMA receptacle with oxygen inlet.                                          |
| 7  | Figure S6: Photomicrographs of the polyethylene membranes.                                          |
| 8  | Figure S7: Luminescence of singlet oxygen in D <sub>2</sub> O and in air.                           |
| 9  | Figure S8: Image of the loss of singlet oxygen in bubbles that reach the air interface.             |
| 10 | Table S1: Device dimensions and membrane characteristics.                                           |
| 11 | Table S2: Calculated particle surface area based on loading.                                        |

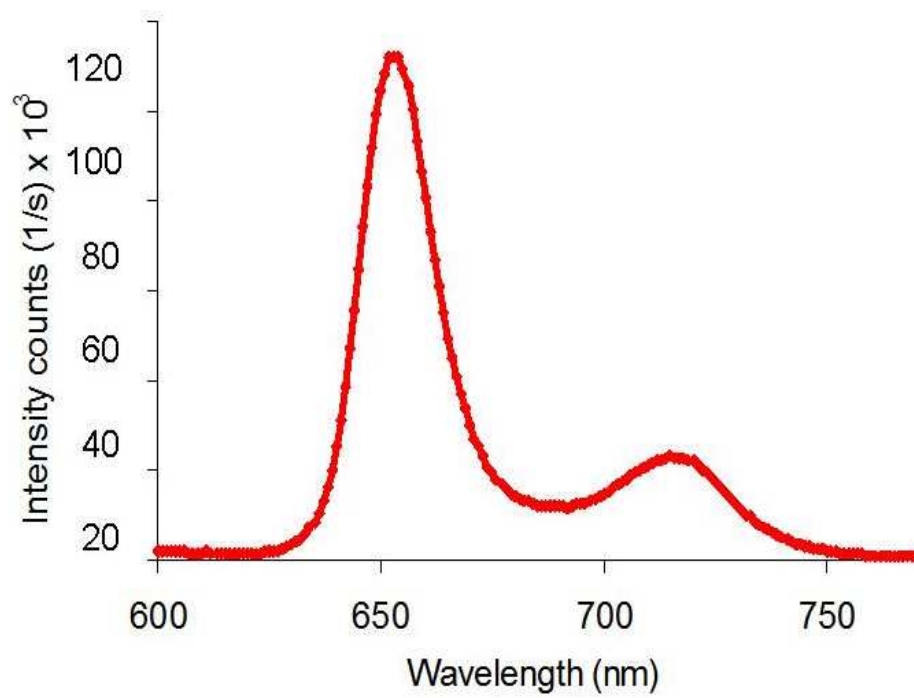

**Figure S1.** Fluorescence spectrum ( $\lambda_{\text{ex}} = 250$  up to 400 nm) of a sheet of Pc **1**, ~0.5 mm in thickness.

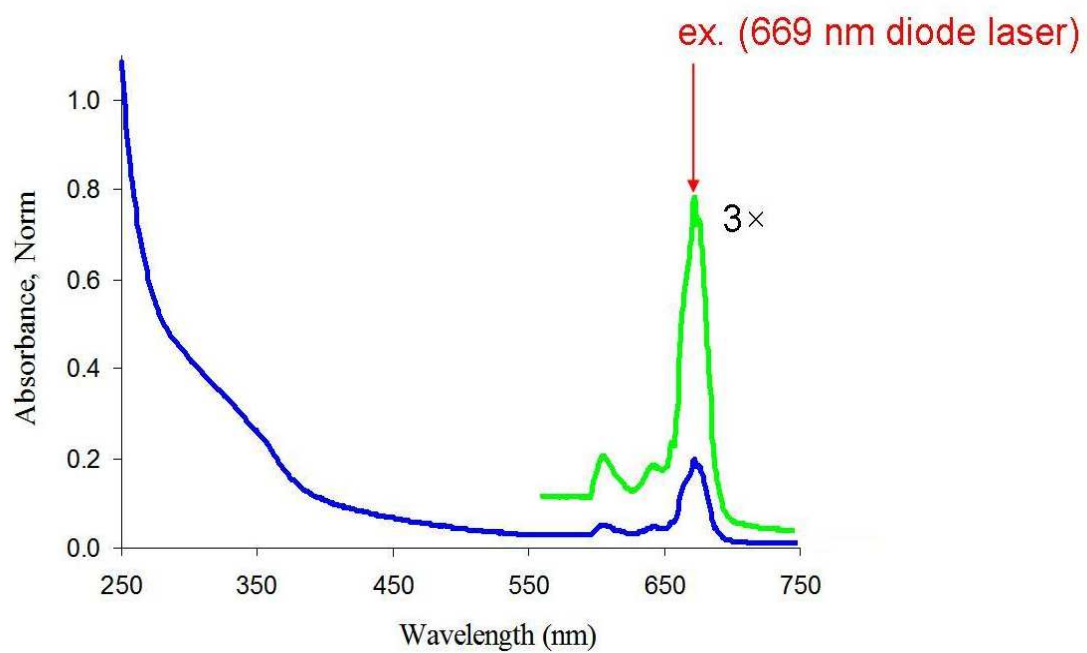

**Figure S2.** UV-VIS spectrum of the  $^1\text{O}_2$  sensitizing glass Pc 1. The red arrow shows where the 669 nm laser line of the diode laser overlaps the Q-band.

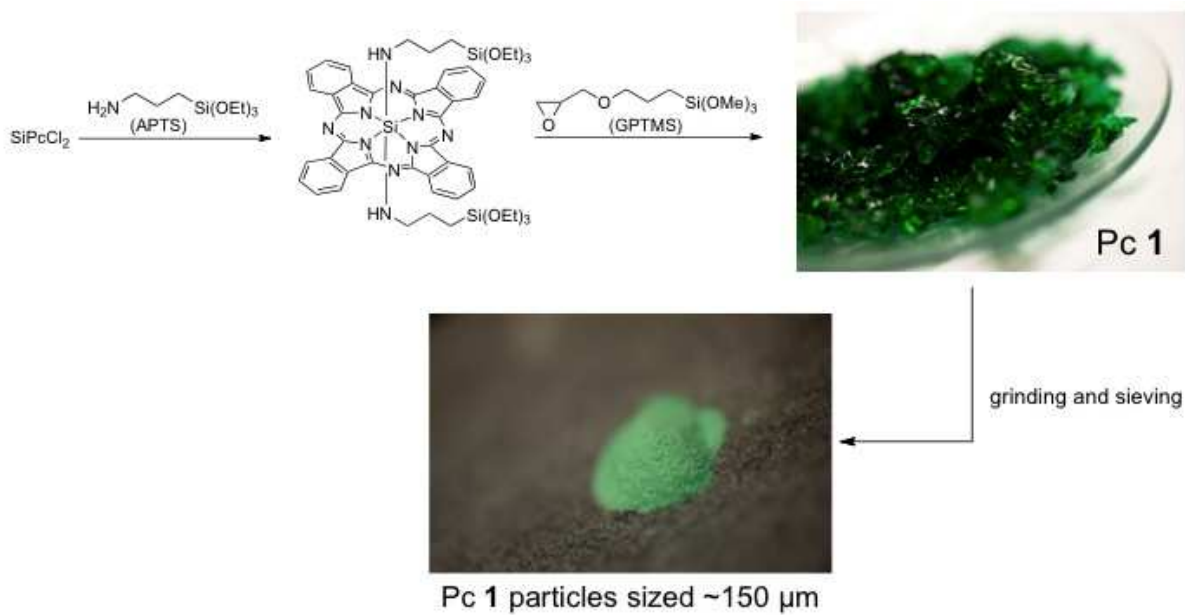

**Figure S3.** Schematic of the synthetic approach used as well as photos showing the hybrid  $^1\text{O}_2$  sensitizing (phthalocyanine entrapped sol-gel) glass, and the fine powder achieved after grinding.

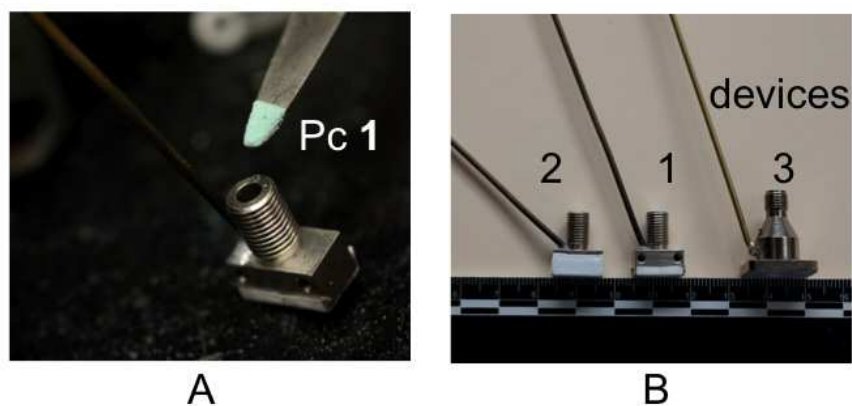

**Figure S4.** These photos show (A) the loading of  $\sim 150\ \mu\text{m}$  Pc 1 sensitizer particles into the chamber of device 2 via a spatula, and (B) the three devices (without optical fiber) placed above a centimeter-scaled ruler.

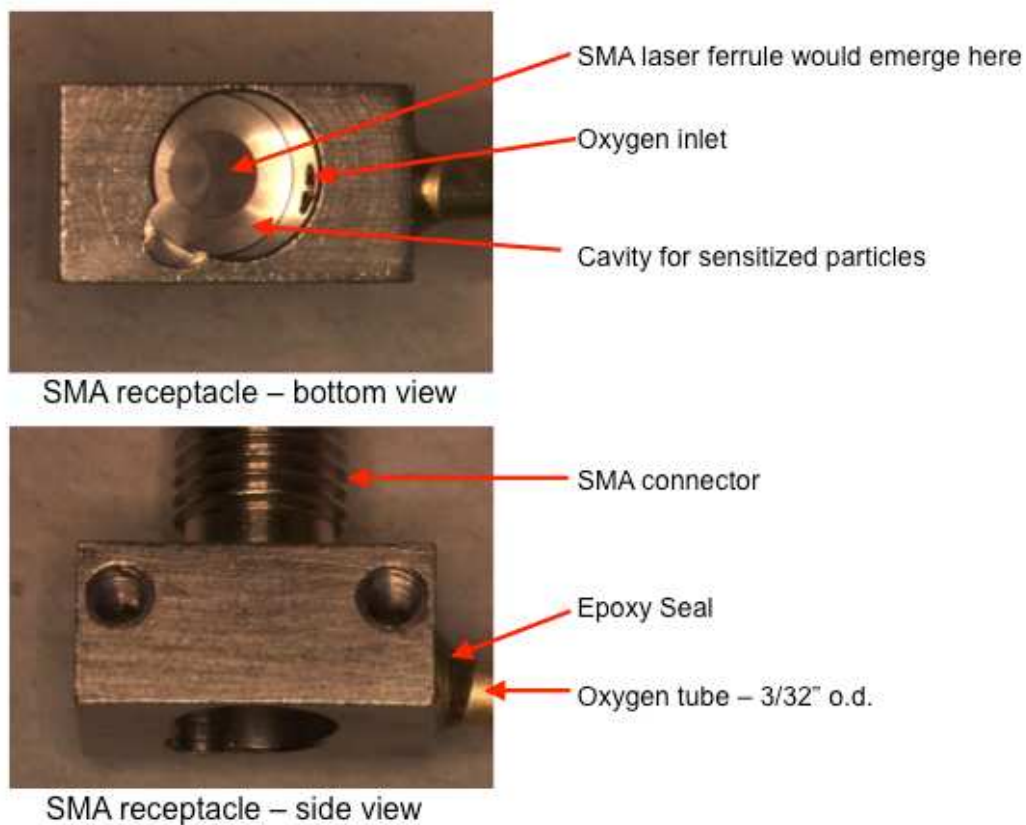

**Figure S5.** Images of the SMA receptacle with oxygen inlet.

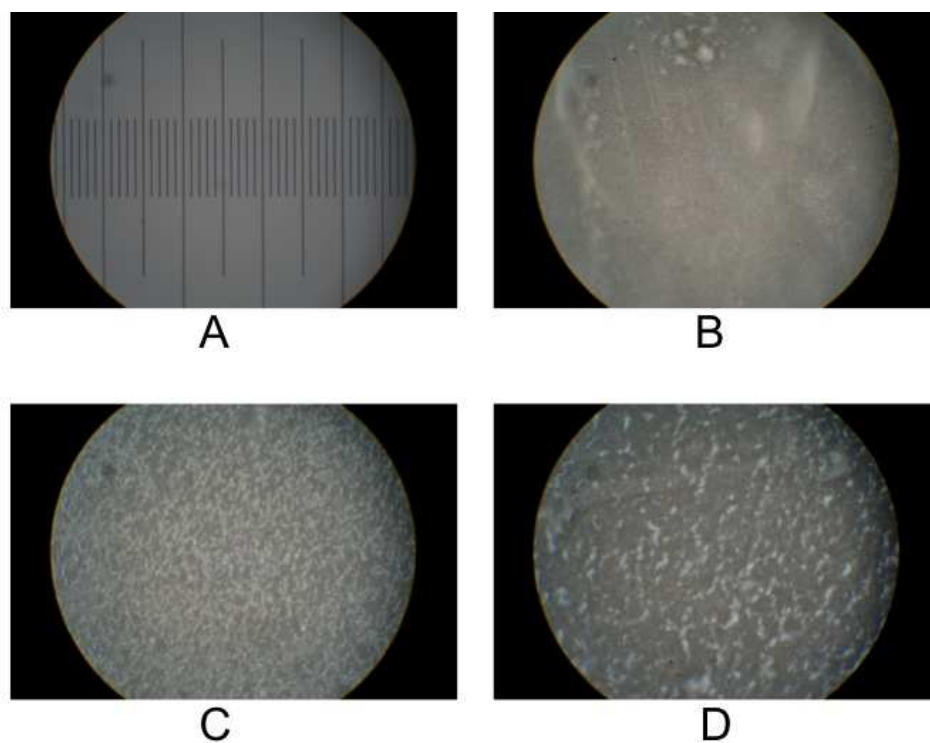

**Figure S6.** Photomicrographs of the polyethylene membranes: (A) micrometer calibration (1 unit =0.007368 mm =7.37  $\mu\text{m}$ ); (B) 0.05  $\mu\text{m}$  pore size membrane; (C) 0.22  $\mu\text{m}$  pore size membrane; and (D) 0.44  $\mu\text{m}$  pore size membrane. The individual pores were too small to resolve and see under the low-power magnification.

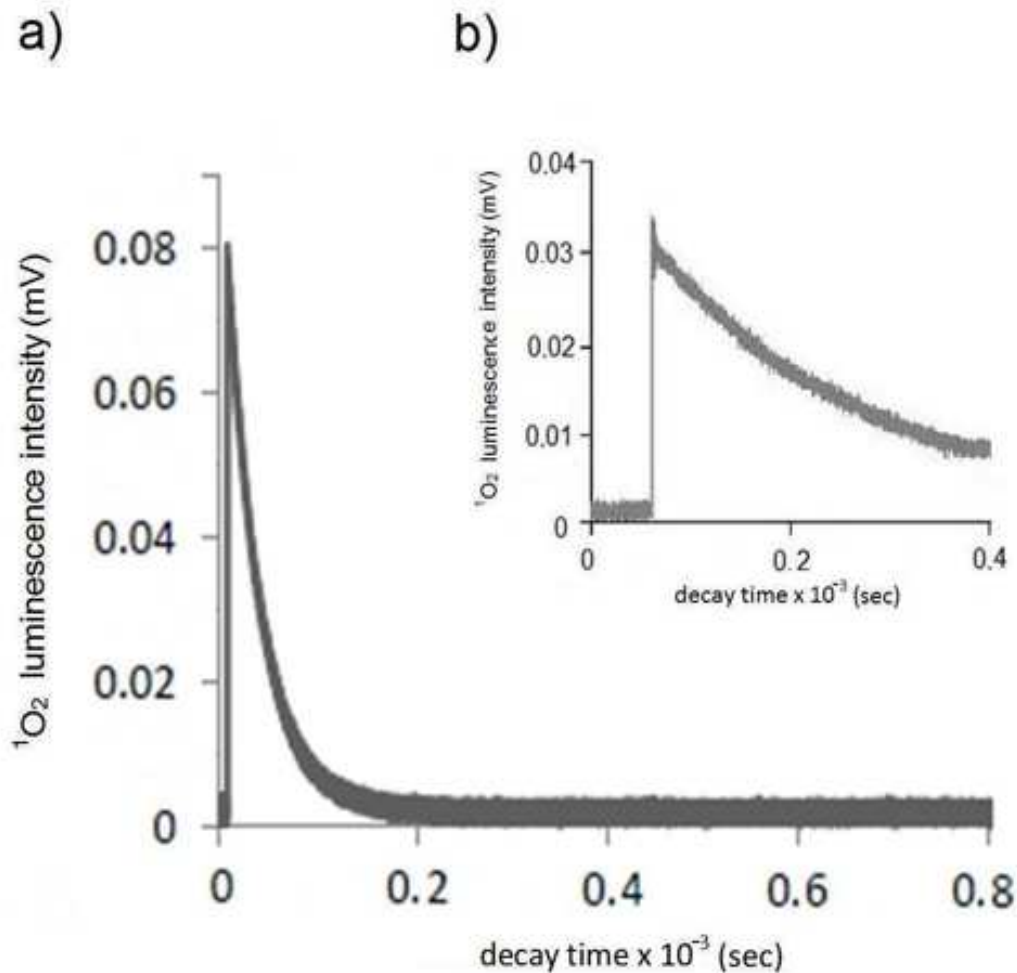

**Figure S7.** Luminescence from singlet oxygen at 1270 nm were observed with 355-nm pulsed irradiation through 35 mg of sensitizer particles loaded into device 1 with flowing oxygen (60 mL/min). First-order decay kinetics were observed and fitted to the equation  $[\text{luminescence}_{1270}(t) = A \times (\exp^{-t/\tau})]$ , where  $1/k_{\text{obs}} = \tau(^1\text{O}_2)$  lifetime. The lifetime of singlet oxygen in (a) 3 mL  $\text{D}_2\text{O}$  was  $60 \pm 3 \mu\text{s}$  (average of 6 experiments), and (b) in air was  $\sim 1.1$  ms (estimated from 3 experiments).



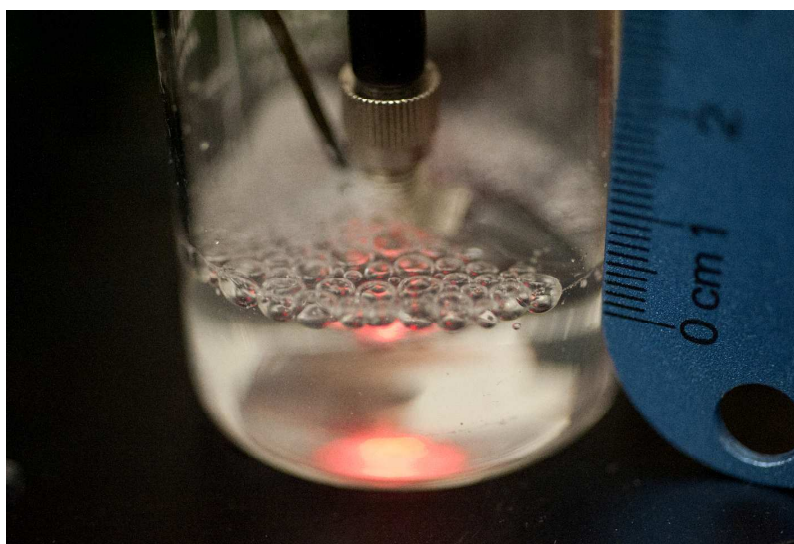

**Figure S8.** Loss of singlet oxygen in bubbles that reach the air interface from device 2 loaded with 35 mg sensitizer particles. The O<sub>2</sub> flow rate was 60 mL/min.

**Table S1. Device Dimensions and Membrane Characteristics**

| Device | Chamber Diameter (mm) | Chamber Height (mm) | Membrane Pore Size ( $\mu\text{m}$ ) | Membrane Thickness ( $\mu\text{m}$ ) | Capillary Pressure (PSI) |
|--------|-----------------------|---------------------|--------------------------------------|--------------------------------------|--------------------------|
| 1      | 5.7                   | 5.3                 | 0.05                                 | 70                                   | 108                      |
| 2      | 5.7                   | 5.3                 | 0.22                                 | 90                                   | 25                       |
| 3      | 10                    | 10                  | 0.44                                 | 150                                  | 12                       |

**Table S2. Calculated Particle Surface Area Based on Loading**

| Quantity of Pc 1<br>loaded into devices<br>(mg) | Total surface area of<br>sensitizer particles 1<br>(mm <sup>2</sup> /mg) | Total number of<br>sensitizer particles<br>1 |
|-------------------------------------------------|--------------------------------------------------------------------------|----------------------------------------------|
| 0                                               | 0                                                                        | 0                                            |
| 1                                               | 30                                                                       | 420                                          |
| 3                                               | 90                                                                       | 1260                                         |
| 10                                              | 300                                                                      | 4200                                         |
| 35                                              | 1050                                                                     | 14,700                                       |
| 50                                              | 1500                                                                     | 21,000                                       |
| 75                                              | 2250                                                                     | 31,500                                       |

<sup>a</sup> 150±30 μm sensitizer particles.
